# Supplementary material for: Non-Invasive Characterization of Experimental Bone Metastasis in Obesity Using Multiparametric MRI and PET/CT
Source: MDPI journal article supplement (doi:10.3390/cancers14102482), 2022-05-18
Supplement: s1 [file s1]

# Supplementary Materials: Non-Invasive Characterization of Experimental Bone Metastasis in Obesity Using Multiparametric MRI and PET/CT

Tumor take rate

|     |              |
|-----|--------------|
| HFD | 67 % (16/24) |
| ND  | 52 % (12/23) |

Tumor take rate - Badge

|     |            |
|-----|------------|
| HFD | 78 % (7/9) |
| ND  | 78 % (7/9) |

A

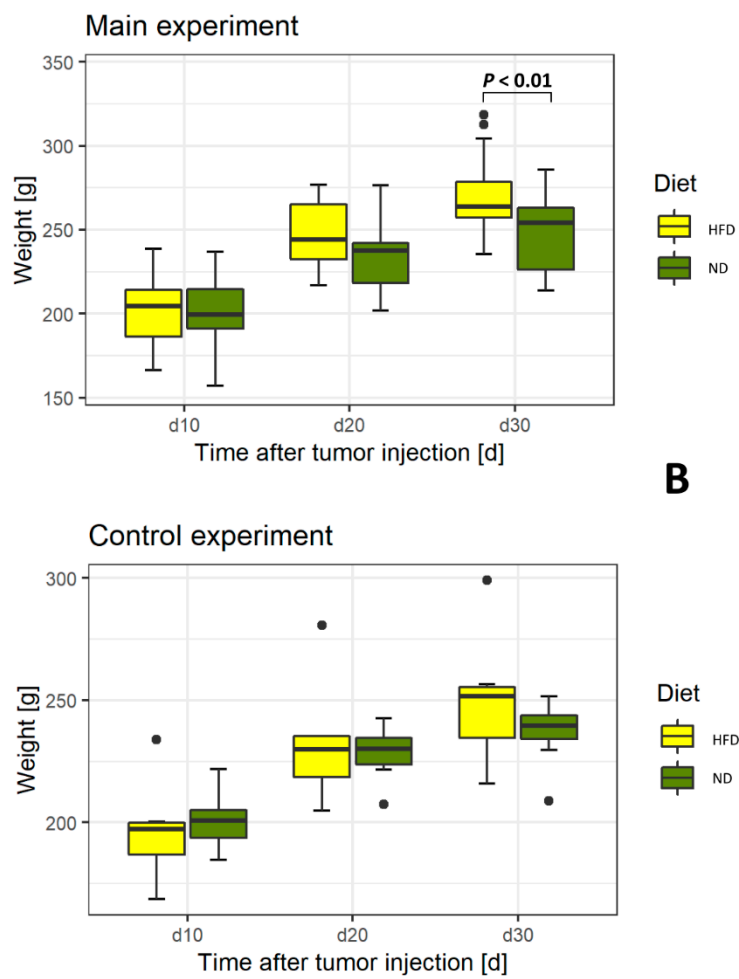

**Figure S1.** Macroscopic features of the experiment with bone metastasis development in HFD and ND rats. **(A)** Tumor development in rats after MDA-MD-231 cell inoculation—Tumor take rate. **(B)** Weight comparisons between HFD and ND in main and control experiments. Statistical analyses have been made with two-way ANOVA. Significant values are defined as  $p < 0.05$ . Values of  $p$  are indicated up to a value of 0.15.

**Table S1.** qPCR primers used for analysis of glycolytic and angiogenic genes.

| Target          | Enzymes                                       | Forward sequence        | Reverse sequence        |
|-----------------|-----------------------------------------------|-------------------------|-------------------------|
| Housekeeping    |                                               |                         |                         |
| <i>Actb</i>     | beta actin                                    | TGTCCACCTTCCAGCAGATGT   | AGCTCAGTAACAGTCCGCCTAGA |
| Glycolysis      |                                               |                         |                         |
| <i>Hk2</i>      | hexokinase 2                                  | GGAGAGCACGTGTGACGAC     | GATGCGACAGGCCACAGCA     |
| <i>Gpi1</i>     | glucose-6-phosphate isomerase 1               | GTTGCCTGAAGAGGCCAGG     | GCTGTTGCTTGATGAAGCTGATC |
| <i>Aldoc</i>    | aldolase C, fructose-bisphosphate             | GGCAGAGATGAACGGGCTTG    | GGCGATGTAGAGGGACTGTG    |
| <i>Ldha</i>     | lactate dehydrogenase A                       | CCAGCAAAGACTACTGTGTAAGT | AGATGTTTACGTTTCGCTGGA   |
| <i>Pkm</i>      | pyruvate kinase                               | CAGGAGTGCTCACCAAGTGG    | CATCAAGGTACAGGCACTACAC  |
| <i>Slc16a3</i>  | solute carrier family 16 member 3             | TGGCATCTCATATGGCATGGTG  | CACCTCCTCAGGCTCTGTC     |
| <i>Slc2a1</i>   | solute carrier family 2 member 1              | TTAATCGCTTTGGCAGGCGG    | CCCAGTTTGGAGAAGCCCAT    |
| <i>Gapdh</i>    | glyceraldehyde-3-phosphate dehydrogenase      | CATCACTGCCACCCAGAAGACTG | ATGCCAGTGAGCTTCCCCTTCAG |
| Vascularization |                                               |                         |                         |
| <i>Vegfa</i>    | vascular endothelial growth factor A          | CTGCTGTAACGATGAAGCCCTG  | GCTGTAGGAAGCTCATCTCTCC  |
| <i>Pecam1</i>   | platelet/endothelial cell adhesion molecule 1 | CCAAAGCCAGTAGCATCATGGTC | GGATGGTGAAGTTGGCTACAGG  |
| <i>Angpt1</i>   | angiopoietin 1                                | CCAGGCCCGTTGTTCTTGAT    | GGAAGGGAGACTTGCTCATTC   |
| <i>Ang2</i>     | angiogenin member 2                           | AGAATAAGCAAGTCTCGCTTCC  | TGAACCCTTTAGAGGCTCGGT   |
| <i>Angptl3</i>  | angiopoietin-like 3                           | TGATACCCAATCAGGCAGTCC   | GACTGCCCAGGTGAAAGGAG    |
